# Supplementary figures and images for: A low-cost automated titration system for colorimetric endpoint detection
Source: Royal Society of Chemistry journal article supplement (doi:10.1039/d2an02086f), 2023-01-01

Supporting Information:  
Prototype of auto titrator system.

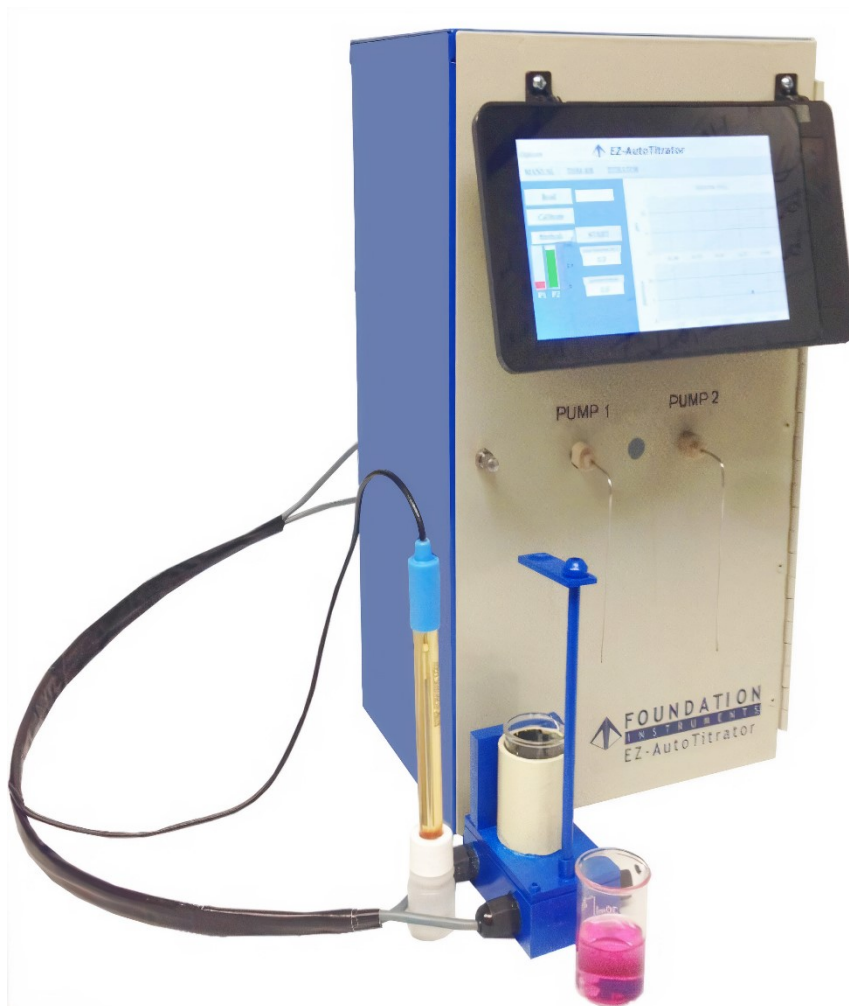

Supplement: d2an02086f1.pdf [file d2an02086f1.pdf]

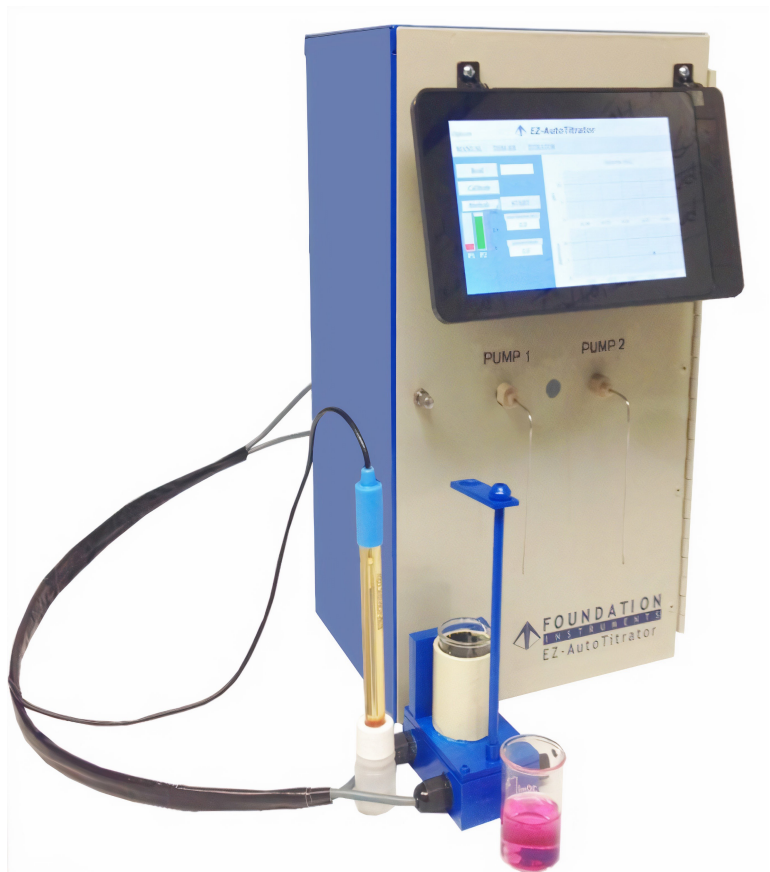

Supplement: d2an02086f2.pdf [file d2an02086f2.pdf]
